# Supplementary material for: New insights in Rett syndrome using pathway analysis for transcriptomics data
Source: Wien Med Wochenschr. 2016 Aug 12;166(11):346–52. doi: 10.1007/s10354-016-0488-4 (PMC5005393; doi:10.1007/s10354-016-0488-4)
Supplement: Supplementary file 1 — Table 1-3 [file 10354_2016_488_MOESM1_ESM.xlsx]

## Sheet: 1. List of change genes
Purkinje cells	Locus caeruleus neurons	TTL5	Fast spiking interneurons
9130023H24Rik	1110032F04Rik	1500009L16Rik	1190002N15Rik
A830080D01Rik	1110034G24Rik	1700001L19Rik	1190005I06Rik
Ablim3	1190002N15Rik	1700016K19Rik	4931423N10Rik
Abracl	1700001L19Rik	2010315B03Rik	AA415398
Abtb2	1700007G11Rik	2300009A05Rik	Abtb2
Acadl	1700030K09Rik	2310022B05Rik	Acadl
Ackr1	1700040L02Rik	2510009E07Rik	Acadvl
Acta1	1810026J23Rik	3110009E18Rik	Adamts1
Adamts4	1810055G02Rik	3632451O06Rik	Adamts3
Adcy8	2010107G23Rik	4833420G17Rik	Adamts8
Adgrl1	2010300C02Rik	A230050P20Rik	Adgrb2
Adipor2	2810004N23Rik	Abhd14b	Adgrl2
Afp	4930539E08Rik	Adamtsl5	Agmat
AI987944	4930550L24Rik	Adcy1	Ahr
Aldoc	5730409E04Rik	Adcyap1	Akap12
Alpk2	Aamp	Adgra3	Akap5
Amph	Abca2	Adgrg6	Akr1c18
Amz1	Abcc4	Adprhl2	Amn
Ank	Abhd6	Afap1l1	Antxr2
Ankrd34b	Ablim3	Aga	Appl2
Asah1	Abracl	AI429214	Arap2
Asb4	Abtb2	Akap5	Arhgdig
Atp2a3	Acot1	Amn	Arl8a
Atp7a	Acsl6	Ampd3	Arpin
Atpaf1	Actl6a	Ankrd50	Asf1a
Bcar3	Actr1b	Antxr1	Atg2a
Bmp8a	Actr8	Apol8	Atp7a
Bscl2	Acvr1	Appl2	Atr
Btbd3	Acvr2b	Arc	Bcl2
Camk1d	Adam9	Arf1	Bop1
Camta1	Adcy1	Arf5	Btbd9
Car11	Adcy3	Arfgap3	Cables1
Ccdc136	Adcy9	Arhgdib	Cacna2d3
Ccno	Adcyap1	Arhgef3	Cacnb3
Cd151	Adgre1	Arl4c	Camk2n1
Cd200	Adgrl2	Armc5	Car2
Cd28	Adpgk	Arxes1	Casp8ap2
Cd302	Aff3	Atmin	Ccdc107
Cd99l2	Agl	Atp7a	Ccnb1
Cdh10	Ahi1	Bag3	Cd99l2
Cdh11	AI593442	Batf3	Cdc14b
Cdkl1	Aimp2	Bcl11a	Cdc42ep2
Cdkn1a	Akip1	Bdnf	Cdh7
Cep72	Aldh1a7	Bhlhe40	Celf6
Chd7	Alg13	Birc5	Cenpv
Clic6	Alg3	Blnk	Cep290
Cmya5	Amz1	Bmi1	Cgref1
Cntn3	Ano4	Bmper	Chd2
Cntn4	Ano6	Bmyc	Chkb
Cntn6	Ap1s1	Bok	Chn2
Cntnap4	Ap2a2	Bola1	Chst1
Cntnap5a	Ap3m2	Bpgm	Ckmt1
Coch	Ap5m1	Brinp2	Clic4
Col4a1	Apba2	Bud13	Cngb3
Col4a2	Apobec2	C330027C09Rik	Cnn3
Cox6b2	Apoe	Cacna1e	Cntn4
Cpne9	Ar	Cacna1g	Col11a1
Csgalnact2	Arhgap22	Cacnb3	Col4a1
Ctif	Arhgap36	Cadps2	Col4a2
Cx3cl1	Arhgdig	Camk2n2	Cort
Cyp2s1	Arhgef15	Car12	Cox7a1
Cyp4v3	Arhgef25	Cbfa2t3	Cps1
Cyp4x1	Armcx4	Cbln2	Cpt2
Daglb	Arrb2	Ccdc184	Crip3
Ddit4	Arsa	Ccnd1	Crlf3
Dennd1a	Arxes1	Cd302	Csgalnact2
Dnah6	Arxes2	Cd99l2	Cst6
Dppa3	Atad1	Cda	Ctrl
Dpy19l1	Atp2b1	Cdc25c	Ctxn2
Dusp10	Atp6ap1	Cdh20	Cyp2s1
Dyrk3	Atp6v1g2	Cdh22	D130043K22Rik
Ebf2	Atp7a	Cdk5rap3	Dab1
Endou	Atp8a1	Cdkl4	Dbp
Ephx2	AW551984	Cdkn2aipnl	Ddx4
Espn	B2m	Cdr2	Dleu7
Evc2	B3galt2	Cecr6	Dlgap3
Fam173b	B3gat3	Cetn3	Doc2a
Fam198b	B4galnt4	Cgref1	Dpp7
Fam19a5	BC005624	Chn2	Drd1
Fam214a	Bean1	Chrac1	Dscam
Fap	Bfsp2	Chrd	Dtwd1
Fbxl21	Bicd1	Chrna4	Edc3
Fbxo17	Bin1	Ciao1	Efna3
Fign	Bmper	Cldn23	Elovl5
Fkbp7	Borcs6	Cmc1	Epha10
Fndc4	Btbd11	Cmc2	Ephx2
Focad	Btbd6	Cmc4	Erich3
Fxyd7	Btbd9	Cnpy3	Fam124a
Gabra4	C1qtnf2	Cntn6	Fam195a
Gal	C1qtnf3	Col6a1	Fam198b
Galnt18	C1qtnf4	Comtd1	Fam58b
Gchfr	C2cd4b	Coro2a	Fam78a
Gdf11	Cables1	Cpne5	Fam81a
Gipc2	Cacng3	Cpne6	Fat1
Gls	Calcr	Creg1	Fhdc1
Gnaz	Cald1	Crip2	Fhl2
Gpc6	Calm3	Crmp1	Fig4
Gpr6	Calr3	Crtac1	Fkbp11
Gprasp2	Camk1d	Crym	Flrt3
Gtf2ird1	Car8	Csgalnact2	Fmn1
Haus1	Cask	Cst6	Focad
Hfe	Cast	Ctgf	Frmpd1
Hgsnat	Cbfb	Ctnna1	Gad2
Hist1h4i	Cbln1	Ctxn1	Gadd45b
Hnmt	Ccdc109b	Cuta	Gal3st1
Hs3st1	Ccdc149	Cygb	Galntl6
Hspb6	Ccdc177	D930015E06Rik	Gap43
Id1	Ccdc79	Dclk3	Glra2
Ier3	Ccdc85a	Dctpp1	Glul
Igf1	Ccnl1	Ddb2	Gm1673
Igfbp3	Cd1d1	Ddit4	Grin3a
Igfbp6	Cd24a	Ddrgk1	Grm7
Iglon5	Cd55	Ddx51	Grtp1
Iqsec1	Cd59a	Dhx35	Gsg1l
Jade3	Cd99l2	Dkk3	Gzf1
Kazald1	Cdc14b	Dkkl1	Herc4
Kcna4	Cdc42ep4	Dnajb2	Hirip3
Kdm6b	Cdh10	Dnajc21	Hist1h1c
Klhdc8a	Cdh11	Dner	Hist1h2bc
Klhl13	Cdh7	Doc2b	Hist2h2be
Larp6	Cdhr1	Dpy19l1	Hmg20b
Ldoc1	Cdkl2	Dpysl3	Hpcal1
Lgals3	Cdkn2d	Drc1	Hpcal4
Lhfp	Cds1	Dscam	Hrh3
Lin7b	Cebpzos	Dsel	Id3
Lmo1	Celf2	Dtnbp1	Ifi204
LOC102641229	Cep170b	Dtx4	Igsf21
Lonrf1	Cep83	Dynll1	Impa2
Lrp10	Chd3	E330009J07Rik	Islr
Lrrfip1	Chd7	Ebp	Kcnh5
Lrrtm1	Chic1	Eci2	Kcns3
Lsamp	Chid1	Eif2b3	Kctd17
Mab21l1	Chl1	Elovl1	Klhdc8a
Macrod1	Chm	Elovl2	Klhl14
Mapkapk2	Chodl	Emsy	Klhl28
Mdfi	Chpt1	Entpd6	Kmt2a
Mpped2	Chrna6	Epha10	L3hypdh
Muc15	Chsy1	Ephb3	Ldhd
Myadml2	Chtop	Erich6	Letm2
Myrip	Chuk	Esrrg	Lgals1
Nadsyn1	Ciapin1	Etv1	Lgi1
Nav3	Ckmt1	F2r	Lgr4
Ndp	Clasrp	Fam124a	Limk2
Nek2	Clcn4	Fam126a	Lpin1
Nhsl2	Cldnd1	Fam198b	Lpl
Nqo2	Clstn2	Fam20a	Lrba
Nr2f6	Cnn3	Fam58b	Lrrc20
Nsg2	Cnpy3	Fam84b	Lrrc4b
Nsmce2	Cntn4	Fars2	Lrrtm4
Nudt1	Coa5	Fbxo8	Lzts1
Olig1	Col18a1	Fgd1	Maf
Oma1	Col4a1	Fhl2	Matn2
Pak3	Col4a2	Fkbp9	Mboat2
Pbx3	Col6a5	Flot2	Mctp1
Pcdh11x	Colec11	Flrt1	Med9
Pcdhb15	Coro7	Flrt3	Metrn
Pcdhgc4	Cox18	Fmod	Mfsd9
Pfkm	Cox7a1	Fndc5	Mitf
Pgm2l1	Cpeb2	Fnip2	Mlh1
Pigs	Cplx2	Fpgt	Morn2
Plcb3	Cpne2	Fra10ac1	Mpv17l2
Plcd3	Cpsf1	Fundc2	Mterf2
Plcxd3	Cpt2	Fuom	Myo1b
Pld2	Crabp1	Fxyd7	Napepld
Plekha8	Creg1	G0s2	Ndufaf3
Plppr5	Crim1	Gabrd	Nedd4
Pnck	Crip2	Gbe1	Nedd9
Pnkd	Crlf2	Glra2	Nefl
Podxl2	Crtac1	Gm10257	Negr1
Ppm1j	Cs	Gm12657	Nfkbiz
Ppp1r1b	Csgalnact1	Gm6551	Ninl
Ppp1r9a	Csgalnact2	Gm6557	Nnmt
Prkcd	Ctnna1	Gmpr2	Npas1
Prom1	Cttnbp2	Gng7	Npy
Prpf38a	Cul4a	Gnptg	Nr2c2
Psg16	Cyp7b1	Gpc4	Nr4a2
Ptprn	D430041D05Rik	Gpc5	Nrep
Pvrl2	D5Ertd579e	Gpd1	Nrtn
Pygb	Daam1	Gpr62	Nsmce1
Rab11b	Dab1	Gpx7	Nudt1
Rab26	Dcaf4	Grhpr	Nwd2
Rab39b	Dclk3	Grm1	Olfm3
Rai2	Dctn2	Grm3	Pafah1b3
Ralyl	Dcun1d5	Gsg1l	Paqr4
Ramp1	Ddah1	Gsn	Pcbp3
Rbfox1	Deptor	Gsta4	Pdgfa
Rhob	Derl2	H2-D1	Penk
Rhod	Dfna5	H2-L	Pex12
Rnd1	Dgka	H2-M3	Phtf1
Rnf112	Dgkz	H3f3b	Pkdcc
Rnf182	Dhrs1	H3f3c	Plch1
Rpl12	Dhrs13	Hacd2	Plekha6
Rtel1	Dhx36	Hdgfrp2	Plxdc2
Rundc3a	Dlat	Hecw2	Plxna2
Rwdd2a	Dleu7	Hes1	Pnck
Sash1	Dlgap2	Hhatl	Pnma2
Scd3	Dlk1	Hmgn5	Ppm1b
Scmh1	Dlst	Hpca	Ppp1r1a
Sec14l2	Dnaja1	Hpcal1	Pqlc2
Sepp1	Dnajb11	Hpse	Prdm8
Sgce	Dnajc12	Hs3st4	Prkg2
Shc4	Dnm1	Hsd11b1	Ptgs1
Skor1	Doc2a	Hsd17b10	Ptpn3
Slc26a11	Doc2b	Htr1f	Ptprg
Slc2a6	Dpp10	Htra1	Pxdc1
Slc35d1	Dtnbp1	Ier5	Rab12
Slc41a2	Dusp16	Ift27	Rab29
Slc5a1	Ebf4	Ikbip	Rab33a
Slc6a1	Ebp	Inafm1	Rab39b
Slitrk2	Ece2	Ing2	Radil
Slitrk3	Ecel1	Iqgap2	Rap1gap2
Smco4	Echdc1	Itm2a	Rapgef5
Smo	Echs1	Jam3	Rbbp9
Smpdl3a	Ecsit	Jdp2	Rbm12b1
Sparc	Eepd1	Kcnc1	Rbm12b2
Spata5	Efcab10	Kcnc2	Rbm7
Spsb4	Efna5	Kcnf1	Rbms1
Spx	Efnb3	Kcng1	Rcn1
Srl	Efr3b	Kcng2	Rec8
St6galnac5	Egr1	Kcnh5	Rell1
Stat1	Ehbp1	Kcnk1	Rims2
Sulf2	Ehbp1l1	Kcnt1	Riok1
Sumf1	Ell2	Kctd1	Rnf112
Sycp3	Elmod1	Krt1	Rnpep
Taf5	En1	Ldoc1	Rora
Tbc1d5	Eno2	Lhfp	Rpa3
Tbl1x	Eno3	Lhx2	Rph3a
Tbx1	Enox1	Lin7a	Rrp12
Tgfb1	Entpd3	Lmo1	Rxrg
Tinf2	Entpd6	Lmo4	Ryr1
Tmem116	Eny2	LOC102634333	Samd10
Tmem123	Epb41l4b	LOC102642045	Samd5
Tmem191c	Epha10	Lpin1	Serinc5
Tmem30b	Epha4	Lrig1	Serpine2
Tmtc1	Epha5	Lrrc20	Sertm1
Tor4a	Ephb1	Lrrc75a	Sesn1
Triap1	Ephx1	Lrwd1	Sh3bgr
Trim46	Eps8l1	Lypd6b	Shisa4
Tspo	Ercc1	Lzts1	Simc1
Unc119	Ero1lb	Mal	Siva1
Unc5b	Etf1	Man2a1	Slc27a4
Unc5c	Exoc2	Manbal	Slc29a2
Ung	Eya2	Maob	Slc30a5
Vasp	Ezr	Mas1	Slc36a4
Wls	Fahd2a	Mbp	Slc38a7
Zbtb16	Fam102b	Mbtps2	Slc5a6
Zc3h6	Fam117b	Mctp1	Slc6a7
Zc4h2	Fam126a	Mdfic	Slit3
Zdhhc18	Fam159b	Medag	Slitrk3
Zfp119b	Fam163a	Meis2	Smarcal1
Zfp593	Fam174a	Mgat5	Smco4
Zfp599	Fam179b	Mgp	Snca
Zfp654	Fam47e	Mkx	Snx24
Zfp667	Fam63b	Mobp	Spon1
Zfp90	Fars2	Morn4	Spp1
Zic1	Fat3	Mpp2	Sqle
Zmiz2	Fdx1	Mrap2	Srebf1
	Fgd5	Mtcp1	Stard10
	Fgf1	Mthfd1l	Stmn2
	Fgf12	Mup5	Sulf2
	Fgfr1	Myef2	Svbp
	Fhad1	Myh7	Synm
	Fhdc1	Myo16	Syp
	Fhit	Myo1b	Syt3
	Fhod3	N4bp2l1	Tbc1d5
	Fibcd1	Nab2	Tcerg1l
	Fig4	Ncald	Tex2
	Fkbp4	Necab1	Tgfb3
	Fkbp5	Necab3	Thsd7a
	Flrt1	Nek7	Thumpd1
	Flrt3	Nek9	Timm21
	Fndc3a	Neurod2	Tlr1
	Fndc4	Nfkbil1	Tmem136
	Fnip2	Ngrn	Tmem176b
	Focad	Nop2	Tnfrsf12a
	Fosb	Nov	Top1mt
	Frmd5	Nptx1	Tpbgl
	Frmd6	Nr2f1	Tpm2
	Fry	Nsdhl	Tpst1
	Fstl5	Nsg2	Trim62
	Fxyd7	Nt5c3	Trmt10b
	Fzr1	Nudt12	Trpc3
	G6pc3	Nwd2	Tshz1
	G6pdx	Olfm1	Tspan2
	Gab1	Olfm3	Tspan4
	Gabarap	Olig1	Ube2e3
	Gabrg1	Opn3	Vgf
	Gad1	Orc3	Wbscr16
	Gadd45a	Otud1	Wdfy1
	Galk2	Ovol2	Ybx3
	Garem	Oxr1	Zadh2
	Gas2	Pacsin2	Zdhhc7
	Gatad1	Pamr1	Zfp105
	Gde1	Pappa2	Zfp30
	Gdpd1	Pcbd2	Zfp52
	Gdpd2	Pcdh10	Zfp677
	Gdpd5	Pcdh19	Zfp748
	Gga2	Pcdhb20	Zfp811
	Gga3	Pcdhb3	Zscan18
	Glra2	Pcgf5	Zyx
	Glrx2	Pde5a
	Glul	Pde8b
	Gm1673	Pdgfa
	Gm4246	Pdlim2
	Gm5148	Pdp1
	Gmppb	Pdzrn3
	Gnb4	Pdzrn4
	Gng12	Penk
	Got1	Pex26
	Gpc5	Pgam2
	Gpr1	Phyhipl
	Gpr155	Pigh
	Gpr162	Pkdcc
	Gpr68	Pkmyt1
	Gprc5b	Plat
	Gpx2	Plcd3
	Gpx3	Plcxd3
	Grhpr	Plgrkt
	Gria1	Plxdc1
	Gria3	Plxnd1
	Gsg1l	Pmaip1
	Gsn	Pms1
	Gss	Poc5
	Gsta4	Pola1
	Gstm4	Pop4
	Gstm6	Ppm1k
	Gstt2	Ppm1m
	Gtpbp6	Ppp1r14a
	Gzmk	Ppp1r1a
	Haus8	Pprc1
	Hdac9	Prorsd1
	Herc2	Prss23
	Hey1	Prss35
	Hfe	Psd
	Hibch	Psph
	Higd1a	Ptk2b
	Hist1h1c	Ptpn9
	Hist2h2be	Ptpre
	Hlf	Ptprk
	Hmces	Ptprm
	Hmgcll1	Pus1
	Hmgcr	Pvalb
	Hn1l	Pwp2
	Hnmt	Pygb
	Hook1	Qrfpr
	Hps4	Rab34
	Hrsp12	Rab39
	Hs3st5	Rab39b
	Hs3st6	Rai2
	Hsd17b10	Rasa3
	Hsd17b2	Rasal1
	Hsf1	Rasgef1b
	Hspb6	Rasl10a
	Hsph1	Rbbp9
	Id2	Rbm43
	Idh1	Rcan2
	Ier3	Reg3d
	Ifi30	Rell1
	Ift52	Rem2
	Il18	Rexo2
	Ilkap	Rgs17
	Ino80c	Rhoq
	Insm1	Rims3
	Iqgap2	Riok1
	Iqsec3	Rnaseh1
	Irak2	Rnf150
	Irs2	Rnf152
	Isg20l2	Rnf182
	Isyna1	Rora
	Itfg2	Rpl12
	Itm2a	Rpusd4
	Itpa	Rragd
	Kbtbd6	Rrp36
	Kcna5	Rspo1
	Kcnh1	Runx1t1
	Kcnk1	S100a10
	Kcnmb2	Scarb1
	Kcnt2	Scg3
	Kcnu1	Secisbp2
	Kctd12	Sertad1
	Kctd21	Sertm1
	Kdm3a	Shb
	Kif21a	Shd
	Kif5b	Shisa6
	Klf9	Sidt1
	Klhdc3	Sirt5
	Klhdc4	Slc17a6
	Klhdc8a	Slc17a7
	Klhl1	Slc20a1
	Klhl4	Slc22a23
	Klk1b27	Slc24a3
	Kntc1	Slc26a4
	Krt7	Slc29a4
	L2hgdh	Slc2a13
	Lama2	Slco3a1
	Lamtor4	Smim10l1
	Large	Snrnp70
	Larp6	Snx21
	Lcorl	Snx24
	Ldb2	Socs5
	Leprotl1	Sorcs3
	Lgi3	Spcs3
	Limd2	Specc1
	Lman2l	Sphkap
	Lnp	Spink10
	Lnx1	Spock3
	LOC102634709	Srl
	Lor	Sstr2
	Lrfn5	Stc1
	Lrig1	Stxbp6
	Lrp10	Susd2
	Lrrc20	Syt12
	Lrrc36	Syt4
	Lrrc6	Tbc1d10a
	Lrrc75a	Tbcd
	Lrrc75b	Tbr1
	Lrrn1	Tcea2
	Lrrn3	Tcerg1l
	Lrtm2	Teddm3
	Lxn	Tekt5
	Ly6h	Tenm3
	Lypd1	Tfe3
	Lypd6b	Thap7
	Lztr1	Timm21
	Lzts3	Timm9
	Macf1	Tiparp
	Macrod1	Tm2d3
	Mageh1	Tmem18
	Magi2	Tmem232
	Man2c1	Tmem40
	Maoa	Tmem87a
	Map1s	Tmprss11g
	Map2k5	Tns1
	Map7d1	Trhde
	Mapk12	Trmt10b
	Mapk4	Trmu
	Mapre1	Trnau1ap
	Marcks	Tshz1
	Mb21d2	Tshz2
	Mblac2	Ttc39c
	Mbnl2	Tubb4a
	Mbtps2	Uba5
	Mcm6	Ubash3b
	Mef2c	Ubxn1
	Megf10	Unc5d
	Meig1	Utp3
	Mfn1	Vegfc
	Mfn2	Vgll3
	Mfsd5	Vgll4
	Mgarp	Vwc2
	Mgat5	Vwc2l
	Mief2	Wdr45
	Mllt3	Wfdc18
	Mmaa	Zadh2
	Mmp17	Zbed5
	Mmp2	Zfand6
	Mn1	Zfp605
	Mpp6	Zfp697
	Mrm1	Zfp94
	Mrps28	Zic5
	Mrps7	Zmat4
	Msmo1	Zscan21
	Msrb2
	Mtch1
	Mtfp1
	Mthfsd
	Mtmr14
	Mtpn
	Mvd
	Mvp
	Mxra7
	Myh10
	Myo16
	Myo9b
	Myom2
	Nap1l3
	Ncam1
	Ndrg1
	Ndrg2
	Ndufa6
	Neb
	Necab2
	Nek3
	Neto1
	Nfkbil1
	Nhlh2
	Nit2
	Nkx6-2
	Nmi
	Nov
	Npr3
	Nr2c2ap
	Nr3c2
	Nrbp2
	Nrep
	Nrn1
	Nrp1
	Nrp2
	Nsmce1
	Nt5dc2
	Ntm
	Nudcd2
	Nudt17
	Nudt18
	Nudt3
	Nudt4
	Nwd2
	Nxn
	Oas1c
	Oasl2
	Ociad2
	Opcml
	Opn3
	Ormdl3
	P4ha2
	Pacrg
	Pacsin2
	Pafah1b2
	Palmd
	Panx2
	Parm1
	Parp12
	Pcdhb22
	Pcdhb9
	Pcsk1
	Pdcd4
	Pde8b
	Pdhb
	Pdia3
	Pdzd11
	Pepd
	Perp
	Pex12
	Pex14
	Pfkfb3
	Pfkp
	Pgap1
	Phf10
	Phf23
	Phf5a
	Phlpp1
	Phox2b
	Pih1d1
	Pim2
	Pin1
	Pkdcc
	Pkib
	Pla2g7
	Plaa
	Plat
	Plch1
	Plcxd1
	Plin2
	Plin5
	Plpp3
	Plpp6
	Plppr4
	Plxnd1
	Pmp22
	Pnma1
	Pnma3
	Pno1
	Pnpo
	Pnrc2
	Pom121
	Pon2
	Popdc3
	Ppcs
	Ppm1e
	Ppm1j
	Ppp1r1a
	Ppp1r26
	Ppp5c
	Pradc1
	Praf2
	Prdx3
	Prickle1
	Prickle2
	Prkaa2
	Prr3
	Prrg3
	Prrxl1
	Psd2
	Ptger3
	Ptger4
	Ptgr1
	Ptpn12
	Ptpn3
	Ptpn4
	Ptpra
	Ptprf
	Ptprg
	Ptprk
	Ptrh1
	Pttg1
	Pvrl2
	Pwwp2b
	Pycrl
	Rab26
	Rab34
	Rab3gap1
	Rac3
	Racgap1
	Ramp1
	Rasd1
	Rasgef1b
	Rbm27
	Rbm43
	Rbms3
	Rbp4
	Rcan3
	Rell1
	Rerg
	Rev1
	Rfx5
	Rgs17
	Rgs19
	Rgs4
	Rhobtb2
	Rhoq
	Rnase6
	Rnf11
	Rnf138rt1
	Rnf139
	Rnf166
	Rp9
	Rps14
	Rraga
	Rsph4a
	Rspo2
	Rxrb
	Ryr2
	Ryr3
	Sall2
	Samd14
	Sap30l
	Sash1
	Sat2
	Sbspon
	Scai
	Scarb1
	Scgn
	Scn1a
	Scn3b
	Scx
	Sdc2
	Sdpr
	Sec11a
	Sec23a
	Sec61a2
	Sel1l3
	Sema4a
	Serinc1
	Serpina3n
	Serpinb1b
	Serpine2
	Serpinf1
	Sf3b5
	Sfxn5
	Shisa2
	Shisa3
	Sipa1l1
	Sipa1l2
	Slc12a7
	Slc18b1
	Slc25a16
	Slc25a28
	Slc25a33
	Slc25a44
	Slc2a1
	Slc31a1
	Slc33a1
	Slc36a1
	Slc39a11
	Slc39a12
	Slc39a6
	Slc46a1
	Slc6a15
	Slc6a2
	Slc7a3
	Slc7a4
	Slc9b2
	Slco4c1
	Slit1
	Slit3
	Slitrk1
	Slmo2
	Smad2
	Smarcd3
	Smc5
	Smco4
	Smoc1
	Smyd2
	Snapc2
	Snx21
	Snx24
	Sox4
	Spag6
	Sparc
	Specc1
	Spin2c
	Spink10
	Spns2
	Spr
	Spsb4
	Sptssa
	Srebf1
	Ss18l1
	St8sia2
	St8sia3
	St8sia6
	Stac
	Stard4
	Stbd1
	Steap2
	Stk32a
	Stmnd1
	Stoml1
	Susd4
	Sv2a
	Svopl
	Sympk
	Syndig1l
	Syngr3
	Synm
	Syt12
	Syt2
	Syt5
	Syt7
	Syt9
	Sytl2
	Tab2
	Tacr3
	Taf1d
	Taok1
	Tasp1
	Tdp2
	Tdrd7
	Tenm2
	Tenm3
	Tenm4
	Tgm2
	Thap7
	Thrsp
	Thsd7a
	Thsd7b
	Timm10
	Tjp1
	Tm4sf5
	Tmcc3
	Tmem114
	Tmem120a
	Tmem131
	Tmem136
	Tmem141
	Tmem14c
	Tmem160
	Tmem161b
	Tmem176a
	Tmem178
	Tmem19
	Tmem191c
	Tmem2
	Tmem234
	Tmem26
	Tmem261
	Tmem35
	Tmem51
	Tmem62
	Tmem9
	Tmod1
	Tmtc2
	Tmtc4
	Tpm4
	Tpo
	Tram1l1
	Trappc10
	Trim28
	Trim37
	Trim41
	Trim68
	Trmt2b
	Trp53inp1
	Trp53inp2
	Trpc3
	Trpm4
	Trpv2
	Tshz1
	Tspan6
	Tspyl5
	Ttc30a1
	Tubg1
	U2af1l4
	Uba6
	Ube2d3
	Ube2o
	Ube2ql1
	Ucp2
	Uimc1
	Unc119
	Unc13c
	Unc5c
	Uncx
	Upb1
	Usp2
	Usp5
	Usp6nl
	Uvrag
	Vamp2
	Vcl
	Vopp1
	Vps11
	Vstm2a
	Vwa5a
	Vwc2l
	Wdfy1
	Wdr1
	Wdr34
	Wdr77
	Wfikkn2
	Wipf3
	Wipi1
	Wls
	Wnk2
	Wnt4
	Wscd1
	Wscd2
	Xrcc5
	Ydjc
	Ypel2
	Zadh2
	Zbtb45
	Zdhhc13
	Zdhhc21
	Zfhx4
	Zfp322a
	Zfp334
	Zfp354a
	Zfp383
	Zfp52
	Zfp521
	Zfp536
	Zfp667
	Zfp758
	Zfp825
	Zfyve21
	Zfyve26
	Zmat5
	Zscan26

## Sheet: 2. Pathway statistics 
Purkinje cells: Data points meeting criterion (R): 74	positive (r)	measured (n)	total	%	Z Score	p-value (permuted)
Myometrial Relaxation and Contraction Pathways	8	147	162	0.0544	3.81	0.001
Oxidation by Cytochrome P450	3	36	49	0.0833	3.26	0.011
Endochondral Ossification	4	61	68	0.0656	3.13	0.009
Metapathway biotransformation	6	124	149	0.0484	2.94	0.008
Focal Adhesion	7	177	186	0.0395	2.58	0.01
G Protein Signaling Pathways	4	84	96	0.0476	2.36	0.023
Chemokine signaling pathway	6	165	199	0.0364	2.15	0.028
Alpha6-Beta4 Integrin Signaling Pathway	3	62	68	0.0484	2.07	0.035
Primary Focal Segmental Glomerulosclerosis FSGS	3	63	77	0.0476	2.04	0.046
locus coeruleus neurons: Data points meeting criterion (R): 259
Glutathione metabolism	6	16	38	0.375	5.6	0
Amino Acid metabolism	12	89	206	0.1348	3.31	0.001
Glycolysis and Gluconeogenesis	7	41	71	0.1707	3.24	0.006
Glutathione and one carbon metabolism	5	26	65	0.1923	3.06	0.004
Myometrial Relaxation and Contraction Pathways	16	147	162	0.1088	2.88	0.004
Cholesterol Biosynthesis	3	13	30	0.2308	2.77	0.006
Splicing factor NOVA regulated synpatic proteins	6	40	44	0.15	2.63	0.012
Calcium Regulation in the Cardiac Cell	14	143	161	0.0979	2.26	0.028
One carbon metabolism and related pathways	6	46	86	0.1304	2.24	0.015
Selenium Micronutrient Network	3	19	89	0.1579	1.96	0.04
Statin Pathway	3	19	29	0.1579	1.96	0.032
layer 5 thick tufted pyramidal neurons: Data points meeting criterion (R): 122
Purine metabolism	8	145	323	0.0552	2.23	0.019
SIDS Susceptibility Pathways	4	56	66	0.0714	2.14	0.028
fast spiking interneurons: Data points meeting criterion (R): 96
Fatty Acid Beta Oxidation	5	33	46	0.1515	5.33	0
Mitochondrial LC-Fatty Acid Beta-Oxidation	3	15	19	0.2	4.91	0.002
Nuclear Receptors	4	38	38	0.1053	3.7	0
Adipogenesis genes	8	125	133	0.064	3.47	0.002
PPAR signaling pathway	5	70	88	0.0714	3.03	0.014
miRNA regulation of DNA Damage Response	4	63	99	0.0635	2.42	0.014
Column description:	Amount of genes which meet the criterion	Number of genes in the pathway for which expression data was available in the experimental dataset	Total number of genes in this pathway	% of positive of all genes in this pathway	A measure how much this pathway is affected by the measured changes in gene expression	Probability of finding this observed result when the null hypothesis of the question is true
Criterion: ( [logFC] < -1 OR [logFC] > 1) AND [P.Value] <= 0.05

## Sheet: 3. GO analysis
Ontology-ID	Ontology-term	Ontology-type	number changed (R)	number measured (n)	z-score	p-value (permuted)
Purkinje cells
GO:0048752	semicircular canal morphogenesis	biological_process	3	8	8.08578	0
GO:0043392	negative regulation of DNA binding	biological_process	5	36	5.87558	0
GO:0010823	negative regulation of mitochondrion organization	biological_process	4	26	5.59945	0.0005
GO:0045806	negative regulation of endocytosis	biological_process	4	30	5.12015	0.001
GO:0045840	positive regulation of mitotic nuclear division	biological_process	4	34	4.72249	0.001
GO:0044703	multi-organism reproductive process	biological_process	8	112	4.68405	0.0005
GO:0045912	negative regulation of carbohydrate metabolic process	biological_process	4	35	4.63309	0.002
GO:0014904	myotube cell development	biological_process	3	21	4.63034	0.0035
GO:0006110	regulation of glycolytic process	biological_process	3	22	4.49679	0.006
GO:0005520	insulin-like growth factor binding	molecular_function	3	22	4.49679	0.004
GO:0001501	skeletal system development	biological_process	8	122	4.37338	0.001
GO:0090398	cellular senescence	biological_process	3	25	4.14212	0.008
GO:0007417	central nervous system development	biological_process	5	61	4.10792	0.001
GO:0001664	G-protein coupled receptor binding	molecular_function	10	195	3.94309	0.001
GO:0005903	brush border	cellular_component	3	28	3.84187	0.014
GO:0031253	cell projection membrane	cellular_component	10	204	3.77528	0.002
GO:0009101	glycoprotein biosynthetic process	biological_process	3	29	3.75144	0.0085
GO:0007610	behavior	biological_process	17	448	3.74545	0
GO:0007156	homophilic cell adhesion via plasma membrane adhesion molecules	biological_process	6	94	3.70049	0.0035
GO:0006024	glycosaminoglycan biosynthetic process	biological_process	3	30	3.66518	0.01
GO:0043502	regulation of muscle adaptation	biological_process	3	31	3.58274	0.0115
GO:0008081	phosphoric diester hydrolase activity	molecular_function	5	73	3.57686	0.0035
GO:0006184	GTP catabolic process	biological_process	10	219	3.51515	0.003
GO:0051289	protein homotetramerization	biological_process	4	55	3.35342	0.0105
GO:0031224	intrinsic component of membrane	cellular_component	85	3877	3.35105	0
GO:0001974	blood vessel remodeling	biological_process	3	35	3.28583	0.02
GO:0090184	positive regulation of kidney development	biological_process	3	35	3.28583	0.0175
GO:0016298	lipase activity	molecular_function	5	81	3.28274	0.008
GO:0048839	inner ear development	biological_process	4	57	3.26039	0.0115
GO:2000379	positive regulation of reactive oxygen species metabolic process	biological_process	4	57	3.26039	0.012
GO:0007015	actin filament organization	biological_process	6	110	3.22711	0.0065
GO:0006029	proteoglycan metabolic process	biological_process	3	36	3.21868	0.0195
GO:1903793	positive regulation of anion transport	biological_process	3	36	3.21868	0.0145
GO:0008022	protein C-terminus binding	molecular_function	7	140	3.21401	0.0085
GO:0000723	telomere maintenance	biological_process	3	37	3.15397	0.024
GO:0043112	receptor metabolic process	biological_process	4	62	3.04544	0.016
GO:0005902	microvillus	cellular_component	4	63	3.00516	0.0135
GO:0032370	positive regulation of lipid transport	biological_process	3	40	2.97306	0.022
GO:0048871	multicellular organismal homeostasis	biological_process	3	43	2.80927	0.0255
GO:0000018	regulation of DNA recombination	biological_process	3	43	2.80927	0.0265
GO:0019218	regulation of steroid metabolic process	biological_process	4	69	2.77967	0.021
GO:0042307	positive regulation of protein import into nucleus	biological_process	4	71	2.71005	0.0235
GO:0005615	extracellular space	cellular_component	24	887	2.68947	0.0055
GO:0044272	sulfur compound biosynthetic process	biological_process	4	72	2.67617	0.0205
GO:0031099	regeneration	biological_process	5	102	2.66103	0.0165
GO:0051650	establishment of vesicle localization	biological_process	4	73	2.64289	0.0295
GO:0031256	leading edge membrane	cellular_component	5	106	2.56091	0.0275
GO:1901342	regulation of vasculature development	biological_process	7	174	2.55523	0.0245
GO:0097060	synaptic membrane	cellular_component	8	212	2.53281	0.0225
GO:0050670	regulation of lymphocyte proliferation	biological_process	6	144	2.46025	0.027
GO:0003924	GTPase activity	molecular_function	8	217	2.46023	0.021
GO:0016042	lipid catabolic process	biological_process	7	181	2.4391	0.021
GO:0035556	intracellular signal transduction	biological_process	26	1034	2.41178	0.019
GO:0051216	cartilage development	biological_process	4	81	2.39587	0.0385
GO:0019395	fatty acid oxidation	biological_process	3	52	2.39577	0.043
GO:0000228	nuclear chromosome	cellular_component	3	52	2.39577	0.041
GO:2001237	negative regulation of extrinsic apoptotic signaling pathway	biological_process	4	83	2.33888	0.0475
GO:0030855	epithelial cell differentiation	biological_process	9	270	2.28273	0.0285
GO:0030175	filopodium	cellular_component	3	55	2.27801	0.047
GO:0046872	metal ion binding	molecular_function	68	3326	2.27425	0.0255
GO:0050808	synapse organization	biological_process	4	87	2.22988	0.044
GO:0007420	brain development	biological_process	7	195	2.2222	0.0355
GO:0030198	extracellular matrix organization	biological_process	6	159	2.18984	0.046
GO:0048545	response to steroid hormone	biological_process	10	322	2.1683	0.034
GO:0043005	neuron projection	cellular_component	16	594	2.15605	0.0365
GO:0010942	positive regulation of cell death	biological_process	13	457	2.14366	0.03
GO:0098661	inorganic anion transmembrane transport	biological_process	4	91	2.12692	0.0465
GO:0009636	response to toxic substance	biological_process	5	127	2.10237	0.0465
GO:0030054	cell junction	cellular_component	20	796	2.09516	0.038
Locus coerulerus neurons
GO:0031232	extrinsic component of external side of plasma membrane	cellular_component	3	4	6.21995	0.001
GO:0008889	glycerophosphodiester phosphodiesterase activity	molecular_function	4	7	6.12058	0.0005
GO:0061549	sympathetic ganglion development	biological_process	4	7	6.12058	0
GO:0097264	self proteolysis	biological_process	3	5	5.4576	0.001
GO:0031224	intrinsic component of membrane	cellular_component	271	3877	5.37078	0
GO:0016048	detection of temperature stimulus	biological_process	4	9	5.24035	0.001
GO:0010866	regulation of triglyceride biosynthetic process	biological_process	5	14	5.07883	0.001
GO:0005513	detection of calcium ion	biological_process	3	6	4.8856	0.0045
GO:0030131	clathrin adaptor complex	cellular_component	7	28	4.65394	0.0005
GO:0050919	negative chemotaxis	biological_process	5	16	4.63271	0.0005
GO:0030672	synaptic vesicle membrane	cellular_component	9	43	4.57774	0
GO:0001574	ganglioside biosynthetic process	biological_process	3	7	4.43386	0.0045
GO:0015677	copper ion import	biological_process	3	7	4.43386	0.003
GO:1902284	neuron projection extension involved in neuron projection guidance	biological_process	4	12	4.33366	0.002
GO:0014855	striated muscle cell proliferation	biological_process	5	18	4.2564	0.0005
GO:0048013	ephrin receptor signaling pathway	biological_process	7	32	4.18638	0
GO:0007190	activation of adenylate cyclase activity	biological_process	5	19	4.08868	0.0025
GO:0043005	neuron projection	cellular_component	53	594	4.00865	0
GO:0006071	glycerol metabolic process	biological_process	5	20	3.93232	0.002
GO:0030017	sarcomere	cellular_component	6	27	3.92541	0.003
GO:0032281	alpha-amino-3-hydroxy-5-methyl-4-isoxazolepropionic acid selective glutamate receptor complex	cellular_component	6	27	3.92541	0.003
GO:0005003	ephrin receptor activity	molecular_function	4	14	3.88588	0.004
GO:0033202	DNA helicase complex	cellular_component	4	14	3.88588	0.006
GO:0032869	cellular response to insulin stimulus	biological_process	10	62	3.81011	0.0025
GO:0048156	tau protein binding	molecular_function	3	9	3.75271	0.01
GO:1901160	primary amino compound metabolic process	biological_process	3	9	3.75271	0.012
GO:0031175	neuron projection development	biological_process	18	148	3.7394	0
GO:0007628	adult walking behavior	biological_process	7	37	3.69909	0.0025
GO:0051000	positive regulation of nitric-oxide synthase activity	biological_process	4	15	3.69309	0.005
GO:0006893	Golgi to plasma membrane transport	biological_process	5	23	3.51909	0.0035
GO:0090276	regulation of peptide hormone secretion	biological_process	16	132	3.50865	0.0015
GO:0005769	early endosome	cellular_component	16	132	3.50865	0.001
GO:0048711	positive regulation of astrocyte differentiation	biological_process	3	10	3.48538	0.01
GO:0017154	semaphorin receptor activity	molecular_function	3	10	3.48538	0.0095
GO:0042415	norepinephrine metabolic process	biological_process	3	10	3.48538	0.0135
GO:0055089	fatty acid homeostasis	biological_process	3	10	3.48538	0.0125
GO:0003211	cardiac ventricle formation	biological_process	3	10	3.48538	0.0115
GO:0005516	calmodulin binding	molecular_function	16	134	3.44152	0.001
GO:0031290	retinal ganglion cell axon guidance	biological_process	4	17	3.35441	0.0125
GO:0030521	androgen receptor signaling pathway	biological_process	4	17	3.35441	0.0075
GO:0005227	calcium activated cation channel activity	molecular_function	5	25	3.28086	0.006
GO:0031045	dense core granule	cellular_component	3	11	3.2519	0.0135
GO:0006903	vesicle targeting	biological_process	3	11	3.2519	0.012
GO:0032288	myelin assembly	biological_process	3	11	3.2519	0.0155
GO:0015020	glucuronosyltransferase activity	molecular_function	3	11	3.2519	0.015
GO:0016327	apicolateral plasma membrane	cellular_component	3	11	3.2519	0.011
GO:0004016	adenylate cyclase activity	molecular_function	3	11	3.2519	0.011
GO:0045540	regulation of cholesterol biosynthetic process	biological_process	3	11	3.2519	0.014
GO:0006465	signal peptide processing	biological_process	3	11	3.2519	0.013
GO:0061299	retina vasculature morphogenesis in camera-type eye	biological_process	3	11	3.2519	0.017
GO:0048641	regulation of skeletal muscle tissue development	biological_process	6	34	3.2144	0.008
GO:0030426	growth cone	cellular_component	13	106	3.2075	0.004
GO:0030054	cell junction	cellular_component	62	796	3.20738	0.0015
GO:0042446	hormone biosynthetic process	biological_process	5	26	3.1708	0.0095
GO:0004721	phosphoprotein phosphatase activity	molecular_function	16	144	3.1228	0.0005
GO:0010508	positive regulation of autophagy	biological_process	5	27	3.06604	0.009
GO:0006099	tricarboxylic acid cycle	biological_process	5	27	3.06604	0.009
GO:0044297	cell body	cellular_component	30	332	3.0653	0.002
GO:0042744	hydrogen peroxide catabolic process	biological_process	3	12	3.04521	0.0245
GO:0032317	regulation of Rap GTPase activity	biological_process	3	12	3.04521	0.0245
GO:0017110	nucleoside-diphosphatase activity	molecular_function	3	12	3.04521	0.0185
GO:0051961	negative regulation of nervous system development	biological_process	20	199	3.00551	0.004
GO:0034284	response to monosaccharide	biological_process	13	112	2.98634	0.004
GO:0048487	beta-tubulin binding	molecular_function	5	28	2.96612	0.0135
GO:0006470	protein dephosphorylation	biological_process	15	137	2.96022	0.0025
GO:0048858	cell projection morphogenesis	biological_process	23	241	2.95827	0.001
GO:0045940	positive regulation of steroid metabolic process	biological_process	4	20	2.93404	0.018
GO:0032925	regulation of activin receptor signaling pathway	biological_process	4	20	2.93404	0.0145
GO:0071526	semaphorin-plexin signaling pathway	biological_process	4	20	2.93404	0.014
GO:0010975	regulation of neuron projection development	biological_process	24	257	2.90859	0.003
GO:0001707	mesoderm formation	biological_process	6	38	2.88714	0.012
GO:0016126	sterol biosynthetic process	biological_process	5	29	2.87063	0.017
GO:0046321	positive regulation of fatty acid oxidation	biological_process	3	13	2.86016	0.026
GO:0002092	positive regulation of receptor internalization	biological_process	3	13	2.86016	0.0235
GO:0045956	positive regulation of calcium ion-dependent exocytosis	biological_process	3	13	2.86016	0.0275
GO:0071385	cellular response to glucocorticoid stimulus	biological_process	6	39	2.81203	0.014
GO:0005770	late endosome	cellular_component	12	105	2.80897	0.0065
GO:0016831	carboxy-lyase activity	molecular_function	5	30	2.77922	0.012
GO:0046058	cAMP metabolic process	biological_process	5	30	2.77922	0.015
GO:0005829	cytosol	cellular_component	78	1098	2.7554	0.011
GO:0005884	actin filament	cellular_component	6	40	2.73927	0.0155
GO:0004364	glutathione transferase activity	molecular_function	4	22	2.69668	0.027
GO:0003179	heart valve morphogenesis	biological_process	4	22	2.69668	0.024
GO:0033630	positive regulation of cell adhesion mediated by integrin	biological_process	3	14	2.69293	0.028
GO:0016079	synaptic vesicle exocytosis	biological_process	3	14	2.69293	0.0275
GO:0007548	sex differentiation	biological_process	3	14	2.69293	0.0305
GO:0031572	G2 DNA damage checkpoint	biological_process	5	31	2.69156	0.0145
GO:0030501	positive regulation of bone mineralization	biological_process	5	32	2.60737	0.024
GO:0021675	nerve development	biological_process	5	32	2.60737	0.023
GO:0045211	postsynaptic membrane	cellular_component	17	176	2.59166	0.01
GO:0050681	androgen receptor binding	molecular_function	4	23	2.58811	0.0275
GO:0008203	cholesterol metabolic process	biological_process	10	87	2.58287	0.0095
GO:0005773	vacuole	cellular_component	21	232	2.56501	0.01
GO:0022627	cytosolic small ribosomal subunit	cellular_component	3	15	2.54056	0.0395
GO:0016486	peptide hormone processing	biological_process	3	15	2.54056	0.0395
GO:0042149	cellular response to glucose starvation	biological_process	3	15	2.54056	0.0335
GO:0032590	dendrite membrane	cellular_component	3	15	2.54056	0.029
GO:0051043	regulation of membrane protein ectodomain proteolysis	biological_process	3	15	2.54056	0.0365
GO:0031032	actomyosin structure organization	biological_process	7	54	2.51514	0.0155
GO:0008021	synaptic vesicle	cellular_component	9	77	2.5053	0.015
GO:0005544	calcium-dependent phospholipid binding	molecular_function	4	24	2.48535	0.036
GO:0008376	acetylgalactosaminyltransferase activity	molecular_function	4	24	2.48535	0.0305
GO:0014072	response to isoquinoline alkaloid	biological_process	4	24	2.48535	0.0275
GO:0007009	plasma membrane organization	biological_process	11	102	2.47706	0.011
GO:0007420	brain development	biological_process	18	195	2.4611	0.007
GO:0008285	negative regulation of cell proliferation	biological_process	37	475	2.45268	0.013
GO:0060563	neuroepithelial cell differentiation	biological_process	5	34	2.44842	0.023
GO:0032102	negative regulation of response to external stimulus	biological_process	17	183	2.419	0.013
GO:0000781	chromosome, telomeric region	cellular_component	6	45	2.40636	0.0235
GO:0006090	pyruvate metabolic process	biological_process	6	45	2.40636	0.021
GO:0016667	oxidoreductase activity, acting on a sulfur group of donors	molecular_function	6	45	2.40636	0.0205
GO:0061005	cell differentiation involved in kidney development	biological_process	3	16	2.40076	0.046
GO:0034367	macromolecular complex remodeling	biological_process	3	16	2.40076	0.046
GO:0031000	response to caffeine	biological_process	3	16	2.40076	0.0435
GO:0010460	positive regulation of heart rate	biological_process	3	16	2.40076	0.038
GO:0008089	anterograde axon cargo transport	biological_process	3	16	2.40076	0.0455
GO:0002294	CD4-positive, alpha-beta T cell differentiation involved in immune response	biological_process	3	16	2.40076	0.0485
GO:1903035	negative regulation of response to wounding	biological_process	12	117	2.3985	0.0105
GO:0001702	gastrulation with mouth forming second	biological_process	4	25	2.38784	0.034
GO:0021533	cell differentiation in hindbrain	biological_process	4	25	2.38784	0.0355
GO:0031623	receptor internalization	biological_process	5	35	2.37321	0.0305
GO:0008277	regulation of G-protein coupled receptor protein signaling pathway	biological_process	10	93	2.35095	0.015
GO:0045471	response to ethanol	biological_process	10	93	2.35095	0.022
GO:0045666	positive regulation of neuron differentiation	biological_process	18	202	2.30131	0.023
GO:0006749	glutathione metabolic process	biological_process	5	36	2.3006	0.034
GO:0002709	regulation of T cell mediated immunity	biological_process	6	47	2.28561	0.0325
GO:0006081	cellular aldehyde metabolic process	biological_process	6	47	2.28561	0.0325
GO:0031903	microbody membrane	cellular_component	6	47	2.28561	0.0345
GO:0001101	response to acid chemical	biological_process	21	247	2.25945	0.0265
GO:0021762	substantia nigra development	biological_process	5	37	2.23042	0.038
GO:0051966	regulation of synaptic transmission, glutamatergic	biological_process	5	37	2.23042	0.0395
GO:0030667	secretory granule membrane	cellular_component	6	48	2.22753	0.0315
GO:0042692	muscle cell differentiation	biological_process	11	111	2.17231	0.026
GO:0044306	neuron projection terminus	cellular_component	6	49	2.17089	0.032
GO:0051963	regulation of synapse assembly	biological_process	5	38	2.16251	0.045
GO:0009100	glycoprotein metabolic process	biological_process	7	61	2.15443	0.034
GO:0045202	synapse	cellular_component	21	253	2.14293	0.028
GO:0098609	cell-cell adhesion	biological_process	13	139	2.13856	0.029
GO:0030135	coated vesicle	cellular_component	8	75	2.07672	0.035
GO:0042246	tissue regeneration	biological_process	4	29	2.04137	0.0455
GO:0050806	positive regulation of synaptic transmission	biological_process	8	76	2.03586	0.0425
GO:0048017	inositol lipid-mediated signaling	biological_process	5	40	2.03295	0.049
GO:0005319	lipid transporter activity	molecular_function	7	64	2.01459	0.041
GO:0045177	apical part of cell	cellular_component	9	90	1.99302	0.031
GO:0016209	antioxidant activity	molecular_function	7	65	1.96969	0.049
Layer 5 thick tufted pyramidal neurons
GO:0019911	structural constituent of myelin sheath	molecular_function	3	5	7.72086	0
GO:0002209	behavioral defense response	biological_process	6	25	6.39837	0
GO:1990351	transporter complex	cellular_component	20	235	5.30366	0
GO:0005251	delayed rectifier potassium channel activity	molecular_function	5	28	4.8077	0.0005
GO:0060716	labyrinthine layer blood vessel development	biological_process	4	19	4.80077	0.0005
GO:0016866	intramolecular transferase activity	molecular_function	4	23	4.22169	0.0025
GO:0072529	pyrimidine-containing compound catabolic process	biological_process	3	14	4.20529	0.0055
GO:0030514	negative regulation of BMP signaling pathway	biological_process	5	37	3.93103	0.0055
GO:0019233	sensory perception of pain	biological_process	6	50	3.92438	0.0025
GO:0030672	synaptic vesicle membrane	cellular_component	5	43	3.49101	0.0065
GO:0002287	alpha-beta T cell activation involved in immune response	biological_process	3	19	3.41476	0.02
GO:0030054	cell junction	cellular_component	38	796	3.40926	0.0005
GO:0045598	regulation of fat cell differentiation	biological_process	7	76	3.37044	0.003
GO:0042578	phosphoric ester hydrolase activity	molecular_function	18	301	3.33895	0.0015
GO:0014069	postsynaptic density	cellular_component	9	113	3.31203	0.003
GO:0045211	postsynaptic membrane	cellular_component	12	176	3.21822	0.0025
GO:0001078	RNA polymerase II core promoter proximal region sequence-specific DNA binding transcription factor activity involved in negative regulation of transcription	molecular_function	6	63	3.21786	0.0085
GO:0042995	cell projection	cellular_component	47	1072	3.19546	0.001
GO:0010656	negative regulation of muscle cell apoptotic process	biological_process	3	21	3.17386	0.0185
GO:0060078	regulation of postsynaptic membrane potential	biological_process	5	49	3.12461	0.0175
GO:0051931	regulation of sensory perception	biological_process	3	22	3.06462	0.0195
GO:0032967	positive regulation of collagen biosynthetic process	biological_process	3	22	3.06462	0.0255
GO:0005520	insulin-like growth factor binding	molecular_function	3	22	3.06462	0.027
GO:0008038	neuron recognition	biological_process	3	23	2.96179	0.026
GO:0051966	regulation of synaptic transmission, glutamatergic	biological_process	4	37	2.93726	0.0265
GO:0048286	lung alveolus development	biological_process	4	37	2.93726	0.0195
GO:0010038	response to metal ion	biological_process	14	235	2.92305	0.0025
GO:0016311	dephosphorylation	biological_process	14	238	2.87146	0.005
GO:0006836	neurotransmitter transport	biological_process	6	71	2.86976	0.016
GO:0051965	positive regulation of synapse assembly	biological_process	3	24	2.86471	0.026
GO:0044743	intracellular protein transmembrane import	biological_process	3	24	2.86471	0.0295
GO:0034333	adherens junction assembly	biological_process	3	24	2.86471	0.03
GO:0001505	regulation of neurotransmitter levels	biological_process	5	54	2.86075	0.0165
GO:0007218	neuropeptide signaling pathway	biological_process	7	90	2.84638	0.0125
GO:0005509	calcium ion binding	molecular_function	27	570	2.80963	0.0065
GO:0071385	cellular response to glucocorticoid stimulus	biological_process	4	39	2.80649	0.0165
GO:0008066	glutamate receptor activity	molecular_function	3	25	2.77281	0.032
GO:0051961	negative regulation of nervous system development	biological_process	12	199	2.74913	0.0055
GO:0048839	inner ear development	biological_process	5	57	2.71688	0.017
GO:0007156	homophilic cell adhesion via plasma membrane adhesion molecules	biological_process	7	94	2.71499	0.018
GO:1902692	regulation of neuroblast proliferation	biological_process	3	26	2.6856	0.034
GO:0030276	clathrin binding	molecular_function	3	26	2.6856	0.034
GO:0031012	extracellular matrix	cellular_component	16	301	2.63634	0.0135
GO:0048008	platelet-derived growth factor receptor signaling pathway	biological_process	3	27	2.60265	0.0395
GO:0009112	nucleobase metabolic process	biological_process	3	27	2.60265	0.0325
GO:0007044	cell-substrate junction assembly	biological_process	3	27	2.60265	0.0305
GO:0006140	regulation of nucleotide metabolic process	biological_process	8	119	2.57843	0.017
GO:0044297	cell body	cellular_component	17	332	2.55456	0.013
GO:0070888	E-box binding	molecular_function	3	28	2.5236	0.0385
GO:0017158	regulation of calcium ion-dependent exocytosis	biological_process	3	28	2.5236	0.0395
GO:0001525	angiogenesis	biological_process	12	216	2.44168	0.019
GO:0030029	actin filament-based process	biological_process	13	244	2.38102	0.02
GO:0030857	negative regulation of epithelial cell differentiation	biological_process	3	30	2.37589	0.043
GO:0051015	actin filament binding	molecular_function	6	85	2.36447	0.0325
GO:0043547	positive regulation of GTPase activity	biological_process	15	298	2.32618	0.0185
GO:0045664	regulation of neuron differentiation	biological_process	18	378	2.30382	0.0185
GO:0045682	regulation of epidermis development	biological_process	4	49	2.26074	0.0485
GO:0051899	membrane depolarization	biological_process	6	89	2.23856	0.039
GO:0043269	regulation of ion transport	biological_process	19	412	2.22125	0.0245
GO:0009187	cyclic nucleotide metabolic process	biological_process	4	51	2.1683	0.0475
GO:0050769	positive regulation of neurogenesis	biological_process	13	262	2.108	0.0355
GO:0097305	response to alcohol	biological_process	13	264	2.07898	0.0325
GO:0006091	generation of precursor metabolites and energy	biological_process	8	143	2.01033	0.047
GO:0070374	positive regulation of ERK1 and ERK2 cascade	biological_process	6	97	2.00595	0.0495
Fast spiking interneurons
GO:0016595	glutamate binding	molecular_function	4	10	8.95355	0
GO:0043209	myelin sheath	cellular_component	5	19	7.91687	0
GO:0090181	regulation of cholesterol metabolic process	biological_process	4	16	6.87365	0.0005
GO:0061564	axon development	biological_process	4	20	6.02585	0.0015
GO:0010039	response to iron ion	biological_process	4	21	5.85082	0.001
GO:0031102	neuron projection regeneration	biological_process	4	22	5.68718	0.001
GO:0042053	regulation of dopamine metabolic process	biological_process	3	14	5.43741	0.0035
GO:0002209	behavioral defense response	biological_process	4	25	5.2531	0
GO:0031344	regulation of cell projection organization	biological_process	19	338	5.19797	0
GO:0048678	response to axon injury	biological_process	5	38	5.17764	0.0005
GO:0045664	regulation of neuron differentiation	biological_process	20	378	5.02178	0
GO:0050919	negative chemotaxis	biological_process	3	16	5.01785	0.003
GO:0010043	response to zinc ion	biological_process	4	30	4.67068	0.0035
GO:0009295	nucleoid	cellular_component	4	36	4.12705	0.0025
GO:0005245	voltage-gated calcium channel activity	molecular_function	4	36	4.12705	0.0025
GO:0048565	digestive tract development	biological_process	5	53	4.10281	0.003
GO:0051966	regulation of synaptic transmission, glutamatergic	biological_process	4	37	4.04843	0.004
GO:0048286	lung alveolus development	biological_process	4	37	4.04843	0.005
GO:0071398	cellular response to fatty acid	biological_process	3	23	3.98552	0.006
GO:0050806	positive regulation of synaptic transmission	biological_process	6	76	3.91861	0.003
GO:0045202	synapse	cellular_component	13	253	3.91062	0.002
GO:0042417	dopamine metabolic process	biological_process	3	24	3.87368	0.006
GO:0042304	regulation of fatty acid biosynthetic process	biological_process	3	24	3.87368	0.01
GO:0005544	calcium-dependent phospholipid binding	molecular_function	3	24	3.87368	0.0075
GO:0001659	temperature homeostasis	biological_process	3	24	3.87368	0.0075
GO:0007626	locomotory behavior	biological_process	10	174	3.83412	0.002
GO:0044242	cellular lipid catabolic process	biological_process	7	100	3.83239	0.0025
GO:0031965	nuclear membrane	cellular_component	11	206	3.73945	0.0015
GO:0043005	neuron projection	cellular_component	23	594	3.72428	0
GO:0098531	direct ligand regulated sequence-specific DNA binding transcription factor activity	molecular_function	4	42	3.69433	0.007
GO:0005902	microvillus	cellular_component	5	63	3.59096	0.0045
GO:0030814	regulation of cAMP metabolic process	biological_process	6	86	3.53642	0.0025
GO:0070588	calcium ion transmembrane transport	biological_process	6	90	3.39932	0.0065
GO:0045177	apical part of cell	cellular_component	6	90	3.39932	0.007
GO:0043588	skin development	biological_process	4	47	3.39255	0.012
GO:0043473	pigmentation	biological_process	4	47	3.39255	0.0105
GO:0019098	reproductive behavior	biological_process	3	30	3.31481	0.0145
GO:0030054	cell junction	cellular_component	27	796	3.30884	0.0025
GO:0043271	negative regulation of ion transport	biological_process	5	70	3.29229	0.0085
GO:0042734	presynaptic membrane	cellular_component	4	49	3.2835	0.016
GO:0048813	dendrite morphogenesis	biological_process	3	31	3.23632	0.019
GO:0031111	negative regulation of microtubule polymerization or depolymerization	biological_process	3	31	3.23632	0.021
GO:0016358	dendrite development	biological_process	3	31	3.23632	0.015
GO:0010524	positive regulation of calcium ion transport into cytosol	biological_process	3	31	3.23632	0.025
GO:0048511	rhythmic process	biological_process	10	206	3.21918	0.003
GO:0005201	extracellular matrix structural constituent	molecular_function	3	32	3.16115	0.0265
GO:0000794	condensed nuclear chromosome	cellular_component	3	32	3.16115	0.0185
GO:0007631	feeding behavior	biological_process	5	75	3.10169	0.0115
GO:0009636	response to toxic substance	biological_process	7	127	3.07328	0.008
GO:0051055	negative regulation of lipid biosynthetic process	biological_process	3	34	3.01981	0.0225
GO:0014066	regulation of phosphatidylinositol 3-kinase signaling	biological_process	4	55	2.98853	0.018
GO:0006638	neutral lipid metabolic process	biological_process	4	55	2.98853	0.016
GO:0046982	protein heterodimerization activity	molecular_function	14	355	2.95851	0.005
GO:0043401	steroid hormone mediated signaling pathway	biological_process	4	56	2.94344	0.0185
GO:0009064	glutamine family amino acid metabolic process	biological_process	4	56	2.94344	0.014
GO:0005516	calmodulin binding	molecular_function	7	134	2.9092	0.008
GO:0003707	steroid hormone receptor activity	molecular_function	4	57	2.89937	0.0215
GO:0030315	T-tubule	cellular_component	3	36	2.88909	0.0285
GO:0014075	response to amine	biological_process	3	36	2.88909	0.028
GO:0006333	chromatin assembly or disassembly	biological_process	3	36	2.88909	0.0265
GO:0006029	proteoglycan metabolic process	biological_process	3	36	2.88909	0.026
GO:0005200	structural constituent of cytoskeleton	molecular_function	3	36	2.88909	0.028
GO:0065004	protein-DNA complex assembly	biological_process	5	82	2.86058	0.02
GO:0030534	adult behavior	biological_process	7	137	2.8421	0.0105
GO:0001822	kidney development	biological_process	7	137	2.8421	0.0095
GO:0031012	extracellular matrix	cellular_component	12	301	2.77552	0.0115
GO:0006636	unsaturated fatty acid biosynthetic process	biological_process	3	38	2.76761	0.0265
GO:0050808	synapse organization	biological_process	5	87	2.70379	0.021
GO:0031056	regulation of histone modification	biological_process	5	88	2.67379	0.02
GO:0042493	response to drug	biological_process	13	345	2.67108	0.0105
GO:0002285	lymphocyte activation involved in immune response	biological_process	4	63	2.65437	0.031
GO:0030522	intracellular receptor signaling pathway	biological_process	5	90	2.61505	0.0245
GO:0007218	neuropeptide signaling pathway	biological_process	5	90	2.61505	0.02
GO:1990104	DNA bending complex	cellular_component	3	42	2.54798	0.0425
GO:0031526	brush border membrane	cellular_component	3	42	2.54798	0.0335
GO:0043524	negative regulation of neuron apoptotic process	biological_process	6	122	2.52325	0.0215
GO:0016247	channel regulator activity	molecular_function	4	67	2.50699	0.0375
GO:0030672	synaptic vesicle membrane	cellular_component	3	43	2.49729	0.04
GO:0005654	nucleoplasm	cellular_component	12	327	2.46562	0.015
GO:0042886	amide transport	biological_process	4	71	2.37032	0.037
GO:0046942	carboxylic acid transport	biological_process	7	161	2.36266	0.0315
GO:0008328	ionotropic glutamate receptor complex	cellular_component	3	46	2.35389	0.0445
GO:0006886	intracellular protein transport	biological_process	16	494	2.32499	0.024
GO:0008146	sulfotransferase activity	molecular_function	3	47	2.30872	0.049
GO:0050660	flavin adenine dinucleotide binding	molecular_function	4	73	2.30556	0.0435
GO:0030855	epithelial cell differentiation	biological_process	10	270	2.27819	0.024
GO:0072593	reactive oxygen species metabolic process	biological_process	4	74	2.274	0.043
GO:0016311	dephosphorylation	biological_process	9	238	2.22651	0.0275
GO:0030308	negative regulation of cell growth	biological_process	6	136	2.22535	0.033
GO:0007154	cell communication	biological_process	13	389	2.2089	0.026
GO:0015630	microtubule cytoskeleton	cellular_component	6	137	2.2055	0.0235
GO:0014070	response to organic cyclic compound	biological_process	19	632	2.19894	0.034
GO:0048639	positive regulation of developmental growth	biological_process	5	106	2.19672	0.04
GO:0008021	synaptic vesicle	cellular_component	4	77	2.18241	0.0485
GO:0001764	neuron migration	biological_process	5	107	2.17318	0.047
GO:0005083	small GTPase regulator activity	molecular_function	6	140	2.14698	0.0425
GO:0007283	spermatogenesis	biological_process	10	284	2.10722	0.0345
GO:0048468	cell development	biological_process	16	524	2.07667	0.0405
GO:0034762	regulation of transmembrane transport	biological_process	9	250	2.06821	0.044
GO:0032102	negative regulation of response to external stimulus	biological_process	7	183	1.99304	0.048
